# Supplementary material for: Cyclin A/Cdk1 modulates Plk1 activity in prometaphase to regulate kinetochore-microtubule attachment stability
Source: eLife journal article supplement (doi:10.7554/elife.29303), 2017-11-20
Supplement: supp [file elife-29303-supp-v1.zip]

III

| Condition             | Spindle Length        | Interkinetochore Distance |
|-----------------------|-----------------------|---------------------------|
| Control Prometaphase  | $11.6 \pm 0.4$ , n=20 | $0.7 \pm 0.1$ , n=100     |
| Control Metaphase     | $12.3 \pm 0.2$ , n=27 | $1.3 \pm 0.1$ , n=100     |
| MYPT1 KD Prometaphase | $11.3 \pm 0.3$ , n=13 | $1.0 \pm 0.1$ , n=100     |
| MYPT1 KD Metaphase    | $13.0 \pm 0.2$ , n=17 | $1.6 \pm 0.1$ , n=101     |

Figure 4 Figure Supplement III
