# Supplementary material for: Cyclin A/Cdk1 modulates Plk1 activity in prometaphase to regulate kinetochore-microtubule attachment stability
Source: eLife. 2017 Nov 20;6:e29303. doi: 10.7554/eLife.29303 (PMC5706962; doi:10.7554/eLife.29303)
Supplement: Supplementary file 2. — Dataset filtered by the Aurora B kinase consensus motif (R/K – X – pS/pT) (Kim et al., 2010; Meraldi et al., 2004). [file elife-29303-supp2.xlsx]

## Sheet: Sheet1
peptide sequence	phosphorylation site	protein reference	Phosphopeptide HL Log2 Ratio a	Phosphopeptide HL Log2 Ratio b	Phosphopeptide HL Log2 Ratio c	Phosphopeptide HL Log2 Ratio d	pvalue	ArkB motif
K.DKST#T#PGGTGIKPFLER.F	T363:T364	sp|Q9NQW6|ANLN_HUMAN				4.43462		Centrosome/Cytoskeleton
R.RKS#EAGSGAASSSGEDKENDGFVFK.M	S178	sp|P30305|MPIP2_HUMAN	2.95568	3.38794	3.42165	3.25923	7.59765e-05	Centrosome/Cytoskeleton
R.RGS#LPDTQPSQGPSTPK.G	S674	sp|Q86Y91|KI18B_HUMAN	1.36178	0.885342	1.02143	1.31769	0.00216299	Spindle-MT
K.TSEIEPKNS#PEDLGLS#LTGDSCK.L	S500:S507	sp|Q12888|TP53B_HUMAN			1.70037	1.71477	0.00268339	Other
K.VQSLEGEKLS#PKSDISPLT#PR.E	S1779:T1788	sp|P46821|MAP1B_HUMAN	1.39163	1.42528	0.872751	1.61379	0.00359875	Spindle-MT
R.SLPS#SSQLKGS#PQAISR.A	S1153:S1160	sp|Q8WYP5|ELYS_HUMAN		0.992679	1.00547		0.00407609	Chromosome
R.YIDTHNRVS#KEDEDIYK.L	S389	sp|Q9NYY3|PLK2_HUMAN			1.66047	1.63395	0.00512533	Other
R.NGDLGAM*KHS#PGLSR.D	S141	sp|Q6P2H3|CEP85_HUMAN	1.13283	1.89458	2.4399	1.55953	0.0078455	Centrosome/Cytoskeleton
R.KSS#TGSPTS#PLNAEK.L	S1773:S1779	sp|Q15746|MYLK_HUMAN			1.69448	1.79928	0.0190913	Centrosome/Cytoskeleton
K.DSISAVSSEKVS#PSK.S	S1252	sp|P46821|MAP1B_HUMAN			1.66	1.77612	0.0215053	Spindle-MT
R.RGS#LPDTQPSQGPSTPKGER.A	S674	sp|Q86Y91|KI18B_HUMAN	1.9346	1.06903	1.51668		0.0264252	Spindle-MT
K.AVTDFVIPECQKKS#PISK.S	S690	sp|Q6P0N0|M18BP_HUMAN	1.22674		1.85948	0.909107	0.0412868	Kinetochore
R.RRS#VTPPEEQQEAEEPKAR.V	S353	sp|P30305|MPIP2_HUMAN	2.83117		3.24119		0.042921	Centrosome/Cytoskeleton
R.TDSQSVRHS#PIAPSSPSPQVLAQK.Y	S306	sp|Q9NQS7|INCE_HUMAN			1.89864	2.22035	0.0496218	Kinetochore
R.DKQEQPSRNS#S#LLEPQK.S	S134:S135	sp|Q6P0N0|M18BP_HUMAN	1.60672		1.11957	0.681546	0.0511238	Kinetochore
R.RRPS#ALEADSPM*APK.R	S645	sp|Q86Y91|KI18B_HUMAN			1.39631	1.16177	0.0582062	Spindle-MT
K.RES#VASGDDRAEEDM*DEAIEK.G	S992	sp|P46821|MAP1B_HUMAN			1.13018	0.881345	0.0783543	Spindle-MT
K.VQSLEGEKLS#PKSDIS#PLTPR.E	S1779:S1785	sp|P46821|MAP1B_HUMAN	1.01131			1.35972	0.0928816	Spindle-MT
R.LTRYS#QGDDDGSSSSGGSSVAGSQSTLFK.D	S12	sp|Q9UH99|SUN2_HUMAN	1.74738		1.21938		0.112127	Centrosome/Cytoskeleton
K.LPRLS#CEPVM*EEK.A	S144	sp|Q9UKI2|BORG2_HUMAN			1.29534	1.87277	0.114773	Centrosome/Cytoskeleton
K.GGPLQALTRES#TR.G	S250	sp|P42167|LAP2B_HUMAN			1.55211	0.913458	0.161357	Other
R.VATSRIS#DAHLADTM*IGK.A	S124	sp|Q9Y657|SPIN1_HUMAN	0.25057	0.979149	3.60559	0.725452	0.162329	Other
K.M*TS#LETKTS#DTETEPSK.T	S853:S859	sp|P46013|KI67_HUMAN			1.67446	0.980594	0.162734	Chromosome
R.RRCS#GLLDAPR.F	S931	sp|Q6P0Q8|MAST2_HUMAN			0.769692	1.3648	0.173098	Other
R.DGKFS#PIQEK.S	S655	sp|O43683|BUB1_HUMAN	1.9383		1.35042	-0.295383	0.274088	Kinetochore
K.KNKAS#PAVALPK.R	S468	sp|Q5FBB7|SGOL1_HUMAN	0.192519	0.480358	3.37276		0.315477	Chromosome
R.RPS#PLAPRPPPSR.W	S1917	sp|Q9UMN6|MLL4_HUMAN			0.526188	1.76614	0.315662	Chromosome
K.HTENTFSRPGGRAS#VDTK.E	S518	sp|Q05682|CALD1_HUMAN	0.163761		0.122977	9.76377	0.405825	Centrosome/Cytoskeleton
R.TAPVEPPLRHS#APPS#PAAGEPR.T	S14:S18	sp|Q6ZSY5|PPR3F_HUMAN			4.11696			Other
R.RPS#PGEM*RDQSPK.G	S125	sp|Q6NYC8|PPR18_HUMAN				3.93143		Centrosome/Cytoskeleton
R.FFSSKTT#AAHSLVGTPYYM*SPER.I	T191	sp|Q8TDX7|NEK7_HUMAN			3.77997			Centrosome/Cytoskeleton
K.DKIIVVPLKENSALAKGS#PSSQSIPEK.N	S1679	sp|Q9H1H9|KI13A_HUMAN			3.56983			Spindle-MT
K.RLERPQDRDT#PVQNK.R	T344	sp|P30305|MPIP2_HUMAN				3.11924		Centrosome/Cytoskeleton
R.LTRYS#QGDDDGSSSSGGSSVAGSQSTLFKDS#PLR.T	S12:S38	sp|Q9UH99|SUN2_HUMAN			2.95098			Centrosome/Cytoskeleton
K.RSS#PDDGNDVSPYSLSPVSNK.S	S138	sp|Q9UM11|FZR_HUMAN			2.52959			Other
K.ESPARST#PHRT#PIITPNTK.A	T393:T397	sp|Q9NQW6|ANLN_HUMAN			2.52481			Centrosome/Cytoskeleton
R.YSQGDDDGSSSSGGSSVAGSQSTLFKDS#PLR.T	S38	sp|Q9UH99|SUN2_HUMAN				2.39625		Centrosome/Cytoskeleton
R.RRLS#NLPTVDPIAVCHELYNTIR.D	S39	sp|Q86U86|PB1_HUMAN			2.18121			Chromosome
R.KVVDYSQFQES#DDADEDYGRDS#GPPTK.K	S19:S30	sp|Q9H1E3|NUCKS_HUMAN			2.13624			Other
R.DVKNS#PLEPDTS#TPLKK.K	S1136:S1143	sp|Q92794|KAT6A_HUMAN			2.13222			Chromosome
R.DVKNS#PLEPDTST#PLKK.K	S1136:T1144	sp|Q92794|KAT6A_HUMAN			2.13222			Chromosome
R.RRS#VTPPEEQQEAEEPK.A	S353	sp|P30305|MPIP2_HUMAN			2.1257			Centrosome/Cytoskeleton
R.RKT#M*CGTLDYLPPEM*IEGR.M	T232,T198	sp|Q96GD4|AURKB_HUMAN,sp|Q9UQB9|AURKC_HUMAN				2.11311		Kinetochore
R.RS#PPADAIPK.S	S11	sp|P18754|RCC1_HUMAN				2.08713		Chromosome
K.RLS#M*EIEK.E	S518	sp|P35240|MERL_HUMAN			2.0344			Other
R.TRLS#T#ASEETVQNR.V	S49:T50	sp|O43379|WDR62_HUMAN			1.98585			Centrosome/Cytoskeleton
R.LSLLEERRT#PPPTKR.S	T867	sp|Q6P0Q8|MAST2_HUMAN			1.98492			Other
R.RKS#AGNIPLS#PLAR.T	S1373:S1380	sp|O15021|MAST4_HUMAN			1.97696			Other
R.GNDPLTS#SPGRSS#R.R	S26:S32	sp|P49736|MCM2_HUMAN			1.9506			Other
K.GIGEFFRLS#PKDSEKENQIPEEAGSSGLGK.A	S72	sp|Q15004|PAF15_HUMAN			1.94948			Centrosome/Cytoskeleton
K.GIGEFFRLSPKDS#EKENQIPEEAGSSGLGK.A	S76	sp|Q15004|PAF15_HUMAN			1.94948			Centrosome/Cytoskeleton
R.HKLS#SGLLPK.L	S975	sp|O15021|MAST4_HUMAN			1.84456			Other
R.SRPTPQDYEM*RVS#PSDTT#PLVSR.S	S2046:T2051	sp|Q9HCK8|CHD8_HUMAN			1.8304			Chromosome
R.LVDVS#PDRGS#PPSRVPQALNFSPEESDSTFSK.S	S575:S580	sp|Q9NYZ3|GTSE1_HUMAN			1.82296			Other
K.ANNIHSSPSFTHLDKSS#PQK.F	S287	sp|Q8NEM0|MCPH1_HUMAN			1.80344			Chromosome
R.RGS#LPDTQPS#QGPSTPKGER.A	S674:S681	sp|Q86Y91|KI18B_HUMAN				1.75198		Spindle-MT
K.YGLQDS#DEEEEEHPSKTS#TK.K	S888:S900	sp|P52948|NUP98_HUMAN			1.7463			Other
K.RKPS#TSDDSDSNFEK.I	S1469	sp|P11388|TOP2A_HUMAN				1.71464		Chromosome
R.KES#LPSNER.A	S1649	sp|Q9NR48|ASH1L_HUMAN				1.70825		Chromosome
R.RLASTSDIEEKENRDS#SSLR.T	S519	sp|O14974|MYPT1_HUMAN			1.64885			Kinetochore
R.RSS#DTSGSPAT#PLK.A	S526:T534	sp|Q7Z5R6|AB1IP_HUMAN				1.63171		Centrosome/Cytoskeleton
R.SISKDS#LASNIVNLT#PQNQPHPTATK.S	S503:T512	sp|Q5T5Y3|CAMP1_HUMAN			1.62368			Centrosome/Cytoskeleton
R.LKLS#PNKYQPIQPIQTSK.L	S654	sp|Q9C0D2|K1731_HUMAN			1.59633			Centrosome/Cytoskeleton
K.RIQSS#PGALSEDKCS#PKK.V	S574:S584	sp|Q5T7B8|KIF24_HUMAN				1.57021		Spindle-MT
K.SGLSSLAGAPSLKDS#ESKR.G	S305	sp|O95684|FR1OP_HUMAN			1.56758			Centrosome/Cytoskeleton
R.KET#PSAPAKGVEELESLCEVYR.Q	T1637	sp|P49454|CENPF_HUMAN			1.55813			Kinetochore
R.NISKLS#PPR.I	S365	sp|Q6P0N0|M18BP_HUMAN			1.55502			Kinetochore
K.KLSS#ERPS#S#DGEGVVENGITTCNGK.E	S278:S282:S283	sp|Q8N556|AFAP1_HUMAN				1.54293		Centrosome/Cytoskeleton
K.HFSTESVPDEEGRQS#PAM*RPR.S	S290	sp|Q6P0Q8|MAST2_HUMAN			1.53556			Other
R.RIS#QQHSIYIS#PHKNGSGLTPR.S	S980:S988	sp|P28749|RBL1_HUMAN			1.51401			Chromosome
R.RRLS#PPSSSAASSYSFSDLNSTRGDADM*YDLPK.K	S49	sp|P50402|EMD_HUMAN				1.49808		Centrosome/Cytoskeleton
R.ESSVDCLKES#PNKQQER.A	S1230	sp|B2RTY4|MYO9A_HUMAN			1.48187			Centrosome/Cytoskeleton
R.KSLPASITM*HKGS#LDLQK.C	S489	sp|Q9BZ95|NSD3_HUMAN			1.46834			Chromosome
K.M*SFEILRGS#DGEDSASGGK.T	S1508	sp|Q14674|ESPL1_HUMAN			1.46387			Chromosome
R.VATSRIS#DAHLADTMIGK.A	S124	sp|Q9Y657|SPIN1_HUMAN				1.45226		Other
R.DSKRDS#LEEGELRDHCM*EITIR.N	S47	sp|Q9UQ88|CD11A_HUMAN			1.43483			Other
R.NSVAGSNPAKPGLGS#PGRYS#PVHGSQLR.R	S914:S919	sp|Q86XL3|ANKL2_HUMAN			1.42134			Other
R.RNT#FELITVRPQR.E	T1055	sp|Q9NQW6|ANLN_HUMAN			1.42085			Centrosome/Cytoskeleton
K.RRT#PSTTTSSHYLGTLK.V	T390	sp|Q49MG5|MAP9_HUMAN				1.41401		Spindle-MT
K.REAAANTNRPS#PGGHERK.L	S58	sp|O60356|NUPR1_HUMAN				1.39613		Chromosome
R.KHS#LDLPHSELK.K	S1429	sp|Q6P0Q8|MAST2_HUMAN			1.38828			Other
R.DSKRDS#LEEGELR.D	S47,S47	sp|Q9UQ88|CD11A_HUMAN,sp|P21127|CD11B_HUMAN			1.36827			Other
K.KQS#SDYEELIQVLK.K	S547	sp|Q96SN8|CK5P2_HUMAN			1.36161			Centrosome/Cytoskeleton
R.HRTS#GGDHAPDS#PSGENSPAPQGR.L	S87:S95	sp|Q96NY9|MUS81_HUMAN			1.36103			Other
R.SSVDTPPRLS#T#PQKGPSTHPK.E	S401:T402	sp|Q68DK7|MSL1_HUMAN				1.36094		Chromosome
K.GPS#PPLNGNILSCS#PDRRS#PS#PK.E	S2074:S2085:S2090:S2092	sp|P78559|MAP1A_HUMAN			1.34009			Spindle-MT
R.KSS#TGS#PTSPLNAEK.L	S1773:S1776	sp|Q15746|MYLK_HUMAN				1.33379		Centrosome/Cytoskeleton
K.RVS#ISRS#QHDILQM*ICSK.R	S630:S634	sp|P46013|KI67_HUMAN			1.32446			Chromosome
R.HKLT#VS#DGES#GEEKK.T	T1346:S1348:S1352	sp|P46100|ATRX_HUMAN			1.32318			Chromosome
K.HDKDM*EEDRAS#SSSGTIVQEAYGK.I	S4156	sp|Q8WXH0|SYNE2_HUMAN			1.31983			Centrosome/Cytoskeleton
K.AYCPQIGCSHTDIRKS#DLIQDEALR.R	S223	sp|Q96MF7|NSE2_HUMAN			1.31204			Chromosome
K.ITRT#PQASTYSYETSDLCYTAEKKS#PSEAR.Q	T2051:S2072	sp|P46821|MAP1B_HUMAN			1.31032			Spindle-MT
R.KAS#ILEPLTRPRPR.D	S713	sp|P0C7U0|ELFN1_HUMAN			1.30087			Other
R.LTGPSHS#KGS#LGEER.N	S316:S319	sp|Q86U86|PB1_HUMAN			1.29857			Chromosome
K.QDSRGS#PLLGPVVPGPS#PIPSVTEKR.L	S2996:S3007	sp|P49454|CENPF_HUMAN			1.28512			Kinetochore
R.TETDRKS#PSVSLSQSK.E	S1502	sp|Q5VT06|CE350_HUMAN				1.2836		Centrosome/Cytoskeleton
R.ERGS#LDGFM*R.G	S182	sp|O43823|AKAP8_HUMAN			1.28333			Chromosome
R.REVEVKLT#PLILKPFGNSISR.Y	T118	sp|Q14739|LBR_HUMAN			1.25736			Other
K.ILAT#DVSSKNT#PDSKK.I	T123:T130	sp|Q03188|CENPC_HUMAN			1.24577			Kinetochore
K.TRAS#FSFHK.K	S387	sp|Q8TF76|HASP_HUMAN			1.24145			Chromosome
K.NKDSNSIIKDRLS#ETVR.Q	S188	sp|Q9NRZ9|HELLS_HUMAN			1.23927			Other
R.EAELQQLRDS#LDENEATM*CQAYEER.Q	S346	sp|Q9BRK4|LZTS2_HUMAN			1.22601			Centrosome/Cytoskeleton
R.RQS#QKLPVDFER.S	S2794	sp|Q8TCU4|ALMS1_HUMAN				1.22531		Centrosome/Cytoskeleton
R.RVS#FGGHLRPELFDENLPPNT#PLKR.G	S507:T525	sp|P46013|KI67_HUMAN			1.21436			Chromosome
K.SETDKET#SLVK.Q	T738	sp|Q5SW79|CE170_HUMAN			1.20871			Centrosome/Cytoskeleton
R.EAAANTNRPS#PGGHER.K	S58	sp|O60356|NUPR1_HUMAN				1.20357		Chromosome
K.AGFLHHVKKS#DPER.G	S556	sp|Q86XL3|ANKL2_HUMAN			1.20231			Other
R.KLS#YAEVCQKPPKEPSSVLVQPLR.E	S618	sp|Q71RC2|LARP4_HUMAN			1.1918			Centrosome/Cytoskeleton
K.ELFQTPGTDKPT#TDEKTTK.I	T2332	sp|P46013|KI67_HUMAN			1.15475			Chromosome
R.ASPS#PQPSSQPLQIHRQT#PESK.N	S146:T160	sp|Q9HC35|EMAL4_HUMAN			1.12943			Spindle-MT
K.KGFADIPTGKTS#PYILR.R	S3094	sp|P49454|CENPF_HUMAN			1.12689			Kinetochore
K.IT#RTPQASTYSYETSDLCYTAEKKS#PSEAR.Q	T2049:S2072	sp|P46821|MAP1B_HUMAN			1.11122			Spindle-MT
R.CQEHSKES#PARS#TPHRT#PIIT#PNTK.A	S388:S392:T397:T401	sp|Q9NQW6|ANLN_HUMAN			1.10938			Centrosome/Cytoskeleton
K.NEM*RLS#LEDGGKGK.E	S2044	sp|O95613|PCNT_HUMAN			1.10645			Centrosome/Cytoskeleton
R.HRTS#GGDHAPDS#PSGENS#PAPQGR.L	S87:S95:S101	sp|Q96NY9|MUS81_HUMAN			1.10483			Other
R.WNNNKKS#PIKASDLTK.F	S381	sp|Q5QJE6|TDIF2_HUMAN			1.09897			Chromosome
R.AGSRPSTAKPSKIPT#PQRKS#PASK.L	T7554:S7559	sp|Q03001|DYST_HUMAN			1.08795			Centrosome/Cytoskeleton
R.DVKNS#PLEPDTSTPLK.K	S1136	sp|Q92794|KAT6A_HUMAN			1.07967			Chromosome
R.RRLS#PPSSSAASS#YSFSDLNSTRGDADM*YDLPK.K	S49:S58	sp|P50402|EMD_HUMAN				1.0705		Centrosome/Cytoskeleton
R.LTGPSHSKGS#LGEERNPTSK.Y	S319	sp|Q86U86|PB1_HUMAN			1.06565			Chromosome
K.TPKHS#PIKEEPCGSLSETVCK.R	S362	sp|Q68DK7|MSL1_HUMAN				1.0602		Chromosome
K.EIQEELDKLS#PHK.I	S287	sp|Q2KHM9|K0753_HUMAN				1.05372		Centrosome/Cytoskeleton
R.CQEHSKES#PARS#T#PHRT#PIITPNTK.A	S388:S392:T393:T397	sp|Q9NQW6|ANLN_HUMAN			1.04111			Centrosome/Cytoskeleton
R.AS#PSPQPSSQPLQIHRQT#PESK.N	S144:T160	sp|Q9HC35|EMAL4_HUMAN			1.03694			Spindle-MT
R.EKRES#VASGDDRAEEDMDEAIEK.G	S992	sp|P46821|MAP1B_HUMAN				1.01284		Spindle-MT
R.KRRSS#T#VAPAQPDGAESEWTDVETR.C	S912:T913	sp|Q02241|KIF23_HUMAN			1.01047			Spindle-MT
K.RIQSS#PGALSEDKCS#PK.K	S574:S584	sp|Q5T7B8|KIF24_HUMAN			1.00876			Spindle-MT
