# Supplementary material for: Cyclin A/Cdk1 modulates Plk1 activity in prometaphase to regulate kinetochore-microtubule attachment stability
Source: eLife. 2017 Nov 20;6:e29303. doi: 10.7554/eLife.29303 (PMC5706962; doi:10.7554/eLife.29303)
Supplement: Supplementary file 3. — Dataset filtered by the Plk1 kinase consensus motif (D/E-X-pS/pT) (Nakajima et al., 2003; Grosstessner-Hain et al., 2011). [file elife-29303-supp3.xlsx]

## Sheet: Sheet1
peptide sequence	phosphorylation site	protein reference	Phosphopeptide HL Log2 Ratio a	Phosphopeptide HL Log2 Ratio b	Phosphopeptide HL Log2 Ratio c	Phosphopeptide HL Log2 Ratio d	pvalue	Plk1 motif
K.DKS#TT#PGGTGIKPFLER.F	S362:T364	sp|Q9NQW6|ANLN_HUMAN			5.37738	4.43433	0.061001	Centrosome/Cytoskeleton
K.IGECSKSLSFITHIDWS#LDSK.Y	S460	sp|Q6ZMW3|EMAL6_HUMAN			3.40682			Spindle-MT
K.VAADGESREES#LIQESASK.E	S102	sp|Q8TD16|BICD2_HUMAN			2.90768			Other
K.IGEGT#Y#GVVYK.G	T14:Y15,T14:Y15,T14:Y15	sp|P06493|CDK1_HUMAN,sp|P24941|CDK2_HUMAN,sp|Q00526|CDK3_HUMAN	3.7828	2.3601	2.17383	2.93904	0.00441951	Other
R.VETS#EGLNSDLEM*HADK.S	S1959	sp|P49454|CENPF_HUMAN			2.72247			Kinetochore
K.LITSEEERS#PAK.R	S1678	sp|Q12888|TP53B_HUMAN				2.56694		Other
K.DAS#LVTNEDHQR.S	S773	sp|P49454|CENPF_HUMAN				2.55875		Kinetochore
K.KT#EAELS#QDLETSPTAKPQIK.T	T2104:S2109	sp|Q5VT06|CE350_HUMAN				2.47719		Centrosome/Cytoskeleton
K.SPSLS#PSPPS#PLEKT#PLGER.S	S1260:S1265:T1270	sp|P46821|MAP1B_HUMAN			2.13025	2.80952	0.0869955	Spindle-MT
K.RKLEST#ESRSSFSQHAR.T	T424	sp|P02545|LMNA_HUMAN				2.23129		Other
K.LITSEEERS#PAKR.G	S1678	sp|Q12888|TP53B_HUMAN	2.04426		2.4105		0.0522212	Other
K.LM*LSTSEYS#QSPK.M	S523	sp|Q12888|TP53B_HUMAN				2.18466		Other
R.GISSREDS#PQVCDDKGPFK.D	S731	sp|Q9HC77|CENPJ_HUMAN				2.1348		Centrosome/Cytoskeleton
R.ENSKNEES#KHNQELTSQLLAAENK.C	S123	sp|Q86XR8|CEP57_HUMAN			2.09261			Centrosome/Cytoskeleton
K.SQDSS#PVLSELK.L	S300	sp|P51955|NEK2_HUMAN				2.0601		Other
R.KLITSEEERS#PAKR.G	S1678	sp|Q12888|TP53B_HUMAN	1.95739		2.13234		0.0272176	Other
R.LPLPDDEHDLS#DR.E	S8223	sp|Q8NF91|SYNE1_HUMAN			2.01051			Centrosome/Cytoskeleton
K.KRVEGPGSLGLEES#GSRR.M	S249	sp|Q12972|PP1R8_HUMAN			1.99732			Other
K.LQQTVPADAS#PDSKCPICLDRFDNVSYLDR.C	S98	sp|Q9NS56|TOPRS_HUMAN			1.99176			Chromosome
R.HFLPNDLEKS#NGSNALDM*EK.Y	S177	sp|Q8TEP8|CE192_HUMAN			1.94847			Centrosome/Cytoskeleton
K.KEAS#LQFVVEPSEATNRS#VQAHEVHQK.I	S96:S110	sp|Q03188|CENPC_HUMAN			1.92029			Kinetochore
K.DSS#PGSSSTSLLIK.K	S722	sp|Q99550|MPP9_HUMAN				1.90759		Other
R.DRS#PAPSPVLPSSSLR.N	S1457	sp|Q8IWT3|CUL9_HUMAN			1.90734			Spindle-MT
K.SKDAS#LVTNEDHQR.S	S773	sp|P49454|CENPF_HUMAN	1.55588		2.41979	1.71694	0.0189834	Kinetochore
K.FKNEDLT#DELS#LNK.I	T33:S37	sp|P33981|TTK_HUMAN			1.88616			Other
R.KPHDCESS#TVS#EEDYFSSHRDELQSR.K	S366:S369	sp|Q9H4H8|FA83D_HUMAN			3.28185	0.469309	0.409576	Other
R.SRPTPQDYEM*RVS#PSDTT#PLVSR.S	S2046:T2051	sp|Q9HCK8|CHD8_HUMAN			1.8304			Chromosome
R.LVDVS#PDRGS#PPSRVPQALNFSPEESDSTFSK.S	S575:S580	sp|Q9NYZ3|GTSE1_HUMAN			1.82296			Other
K.RSLS#EEKEDHS#DGLAGLK.G	S876:S883	sp|Q6P0Q8|MAST2_HUMAN				1.81821		Spindle-MT
R.TSS#ACHILINNPINACELS#PK.G	S384:S400	sp|O43303|CP110_HUMAN			1.79038			Centrosome/Cytoskeleton
K.KGGNCDLS#HQER.L	S68	sp|Q9H410|DSN1_HUMAN				1.71938		Kinetochore
K.GSGDIS#SDSIDHS#PAK.K	S381:S388	sp|Q9H5I1|SUV92_HUMAN			1.70212			Chromosome
K.GLDFS#DR.I	S70	sp|Q13561|DCTN2_HUMAN				1.70071		Spindle-MT
R.VELS#FGNAHHR.A	S723	sp|Q5T7B8|KIF24_HUMAN			2.10205	1.23137	0.16265	Spindle-MT
K.SVPVNNLPERS#PTDSPR.E	S3175	sp|P49454|CENPF_HUMAN	1.77805	1.36816	2.10902	1.40877	0.00242091	Kinetochore
K.DLDKS#KDELQK.K	S1964	sp|Q02224|CENPE_HUMAN				1.65967		Kinetochore
K.QFDAST#PKNDIS#PPGR.F	T1063:S1069	sp|Q2NKX8|ERC6L_HUMAN			1.46144	1.82511	0.0701584	Kinetochore
R.GGSPIIQEPEEPSEHREESS#PRK.T	S3840	sp|Q01484|ANK2_HUMAN				1.62873		Centrosome/Cytoskeleton
K.FSPIQEKS#PK.Q	S661	sp|O43683|BUB1_HUMAN			1.58401			Kinetochore
K.SVKEDS#NLTLQEKK.E	S1448	sp|P46940|IQGA1_HUMAN			1.54255			Centrosome/Cytoskeleton
R.ALDGEES#DFEDYPM*R.I	S34	sp|Q8IX90|SKA3_HUMAN			2.99886	0.0684578	0.48547	Kinetochore
R.GGSPIIQEPEEPSEHREES#SPRK.T	S3839	sp|Q01484|ANK2_HUMAN				1.51584		Centrosome/Cytoskeleton
R.KKDFLTSENS#LPR.I	S445	sp|P51587|BRCA2_HUMAN			1.47805			Centrosome/Cytoskeleton
K.GTM*DDISQEEGS#SQGEDSVSGSQR.I	S956	sp|Q14683|SMC1A_HUMAN				1.47284		Chromosome
K.S#VPVNNLPERS#PTDSPREGLR.V	S3165:S3175	sp|P49454|CENPF_HUMAN			1.42114			Kinetochore
K.FDDS#GSWR.G	S2551	sp|Q03001|DYST_HUMAN			1.41944			Centrosome/Cytoskeleton
K.LEST#ESRSSFSQHAR.T	T424	sp|P02545|LMNA_HUMAN				1.40873		Other
K.SLSSPTDNLELS#LR.S	S370	sp|Q9Y2X7|GIT1_HUMAN			1.39441			Centrosome/Cytoskeleton
K.SKSEVIEDS#DVETVSEKK.T	S244	sp|Q56NI9|ESCO2_HUMAN	1.75355		1.4429	0.945656	0.0278322	Chromosome
K.IGEGT#YGVVYK.G	T14,T14,T14	sp|P06493|CDK1_HUMAN,sp|P24941|CDK2_HUMAN,sp|Q00526|CDK3_HUMAN	2.44726	0.405487	1.00401	1.63173	0.0517121	Other
K.SELS#PVAR.Q	S2283	sp|P25054|APC_HUMAN			2.44486	0.263119	0.431749	Other
R.KLEST#ES#RSSFSQHAR.T	T424:S426	sp|P02545|LMNA_HUMAN	1.1753	1.4589		1.42411	0.00432959	Other
K.LIGVPADAEALSERS#GNTPNS#PR.L	S549:S555	sp|Q96EA4|SPDLY_HUMAN			1.3474			Kinetochore
-.SETAPAAPAAPAPAEKT#PVKK.K	T18	sp|P10412|H14_HUMAN	1.10273		1.41967	1.50131	0.00811435	Chromosome
R.DSSSLSSCTSGILEERS#PAFRGPDR.A	S322	sp|Q9H3Q1|BORG4_HUMAN			0.746403	1.87795	0.25916	Centrosome/Cytoskeleton
R.SADAEKS#LLEK.L	S1279	sp|Q6UB99|ANR11_HUMAN			1.3098			Chromosome
K.RDVQKELS#ALKK.L	S1405	sp|P46013|KI67_HUMAN			1.30677			Chromosome
R.GDLETS#NLQDM*QSQEISGLKDCEIDAEEK.Y	S1248	sp|P49454|CENPF_HUMAN			1.29447			Kinetochore
K.HAS#PILPITEFS#DIPR.R	S306:S315	sp|P42167|LAP2B_HUMAN			1.29347			Other
K.RGESEEPS#SPQSLCHLVAPGHER.S	S6388	sp|Q8WXH0|SYNE2_HUMAN				1.28603		Centrosome/Cytoskeleton
R.ERIQPEEKPVEVS#PAVTK.G	S470	sp|Q8N0X7|SPG20_HUMAN			1.28474			Spindle-MT
K.TKGDDTDTRDDIS#ILATGCK.G	S598	sp|Q12888|TP53B_HUMAN				1.28358		Other
R.EKS#ISELSDQYKQEK.L	S1010	sp|P49454|CENPF_HUMAN			1.27737			Kinetochore
-.SETAPAAPAAPAPAEKT#PVK.K	T18	sp|P10412|H14_HUMAN	1.09342	1.55083	1.0925	1.35542	0.00143645	Chromosome
R.LPDRS#SLLSEIQALR.A	S2515	sp|O95613|PCNT_HUMAN			1.25524			Centrosome/Cytoskeleton
K.SSGESS#PSEHSSSGVSTPCLK.E	S334	sp|Q9Y3M8|STA13_HUMAN			1.11409	1.39371	0.0706908	Centrosome/Cytoskeleton
R.HRLLSGDST#EK.R	T1036	sp|Q6P0Q8|MAST2_HUMAN				1.24494		Spindle-MT
-.SETAPAETATPAPVEKS#PAKK.K	S18	sp|P16401|H15_HUMAN	0.83784		1.45385	1.38689	0.0244025	Chromosome
R.GKNEES#LESTEGFR.A	S1439	sp|Q9Y6J0|CABIN_HUMAN			2.14829	0.295281	0.413042	Chromosome
K.NKEES#S#DDEDKESEEEPPKK.T	S243:S244	sp|P35659|DEK_HUMAN				1.20213		Chromosome
K.SKSEVIEDS#DVETVSEK.K	S244	sp|Q56NI9|ESCO2_HUMAN			1.19088			Chromosome
K.KGDVEGSQSQDEGEGS#GESERGSGSQSSVPSVDQFTGVGIR.V	S1074	sp|Q9UQE7|SMC3_HUMAN			1.19057			Chromosome
K.VQSLEGEKLS#PKSDIS#PLTPR.E	S1779:S1785	sp|P46821|MAP1B_HUMAN	1.01131			1.35972	0.0928816	Spindle-MT
K.EM*FPYEAS#TPT#GISASCRRPIK.G	S354:T357	sp|P42167|LAP2B_HUMAN			1.18165			Other
R.TIANM*FGSSEKETIELS#PTGRPK.R	S503	sp|Q9NRZ9|HELLS_HUMAN			1.1746			Chromosome
K.ENQPENS#QTPTKK.E	S104	sp|Q12834|CDC20_HUMAN				1.1567		Other
K.QPPTAAGRPVDAS#PRVPGGS#PR.T	S398:S405	sp|Q9Y6G9|DC1L1_HUMAN			1.15508			Spindle-MT
K.KLHQVVETS#HEDLPASQER.S	S307	sp|O43683|BUB1_HUMAN	0.668977		1.70375	1.06063	0.0629755	Kinetochore
R.GERS#VRDVAEVDTVRR.A	S3143	sp|Q15149|PLEC_HUMAN				1.13589		Spindle-MT
K.SNHLLEDS#LK.E	S940	sp|P49454|CENPF_HUMAN				1.13082		Kinetochore
R.SLSEIHSPNIQDSS#FDSVR.E	S1151	sp|Q562F6|SGOL2_HUMAN			1.13061			Chromosome
K.TAQLERS#LQEEHVAVAQLREEAER.R	S1732	sp|Q15149|PLEC_HUMAN			1.12616			Spindle-MT
R.NESCDIS#KEHTSETTERT#PK.H	S1770:T1781	sp|P49454|CENPF_HUMAN			1.12415			Kinetochore
K.VM*ENS#SGTPDILTR.H	S61	sp|Q96GD4|AURKB_HUMAN			1.11892			Kinetochore
K.LVSPETEAS#EESLQFNLEKPATGER.K	S999	sp|Q12888|TP53B_HUMAN			1.1152			Other
K.IRELENS#LHEAK.E	S2389	sp|Q02224|CENPE_HUMAN	0.789508		1.60747	0.932469	0.0479656	Kinetochore
R.QDKPM*DTS#VLSEEGGEPFQKK.L	S395	sp|Q12888|TP53B_HUMAN			1.10832			Other
R.AEETS#SPVIGELWS#PDQTAEASHVSR.Y	S487:S496	sp|Q86XL3|ANKL2_HUMAN			1.10755			Other
R.HRTS#GGDHAPDS#PSGENS#PAPQGR.L	S87:S95:S101	sp|Q96NY9|MUS81_HUMAN			1.10483			Other
K.VLDEQIQERENS#KNEESK.H	S118	sp|Q86XR8|CEP57_HUMAN				1.09914		Centrosome/Cytoskeleton
K.IEEVLSPEGS#PSK.S	S677	sp|Q9UEY8|ADDG_HUMAN				1.095		Centrosome/Cytoskeleton
R.ESS#PLYS#PTFS#DSTSAVKEK.T	S1793:S1797:S1801	sp|P46821|MAP1B_HUMAN			1.0729			Spindle-MT
K.TVLDTS#YALIGETVNNYR.S	S384	sp|Q03188|CENPC_HUMAN			1.04578			Kinetochore
R.CRS#VELDLNQAHM*EET#PK.R	S505:T518	sp|Q14680|MELK_HUMAN				1.04497		Other
R.RREVS#PAPAVAGQSK.G	S1364	sp|O60292|SI1L3_HUMAN				1.03681		Centrosome/Cytoskeleton
K.EKT#PSPKEEDEEPES#PPEKK.T	T202:S214	sp|Q9H1E3|NUCKS_HUMAN	0.443969		1.57575	1.08367	0.0873694	Other
K.KYM*PAVTSTPTVNQHETS#TSK.S	S804	sp|Q15154|PCM1_HUMAN				1.01193		Centrosome/Cytoskeleton
R.HLLDDS#VM*EPHAPSR.G	S374	sp|Q86X27|RGPS2_HUMAN	0.778352		1.21965	1.02892	0.0156633	Centrosome/Cytoskeleton
R.DLLEPS#PADQLGNGHRR.T	S778	sp|Q86XL3|ANKL2_HUMAN			1.71478	0.300533	0.389548	Other
R.GGDVFGDTS#FLSNHGGSSGSTHRS#PR.S	S62:S77	sp|Q00587|BORG5_HUMAN				1.0056		Centrosome/Cytoskeleton
