# Supplementary figures and images for: Cyclin A/Cdk1 modulates Plk1 activity in prometaphase to regulate kinetochore-microtubule attachment stability
Source: eLife journal article supplement (doi:10.7554/elife.29303), 2017-11-20

II

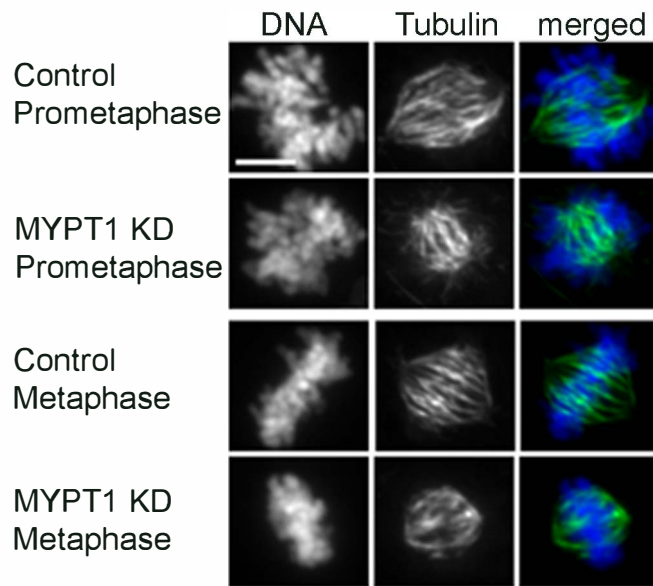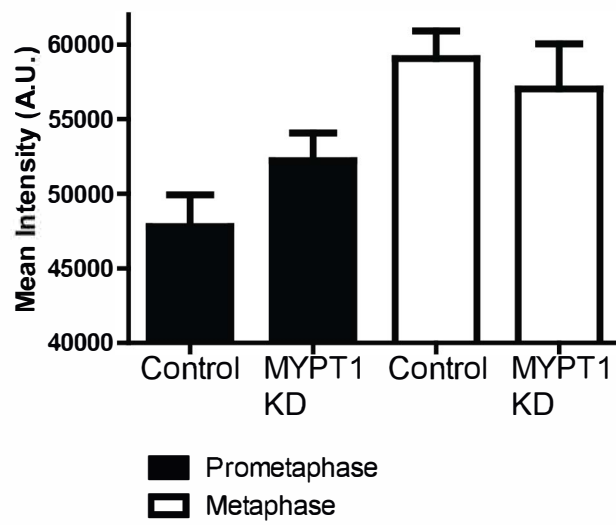

Figure 4 Figure Supplement II

Supplement: supp [file elife-29303-supp-v1.zip]

II

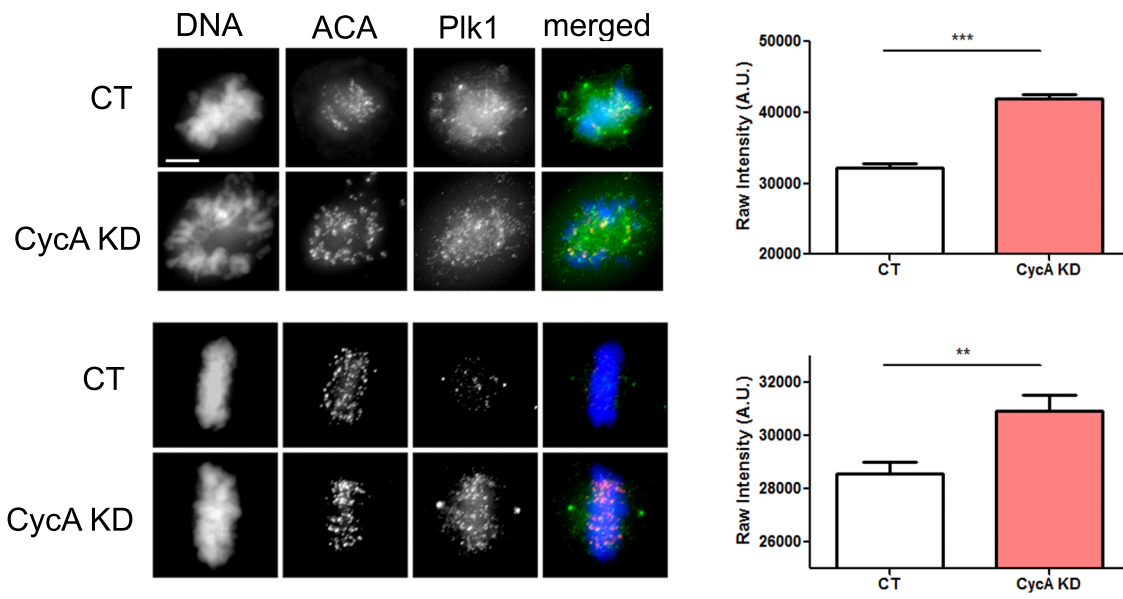

Figure 3 Figure Supplement II

Supplement: supp [file elife-29303-supp-v1.zip]

III

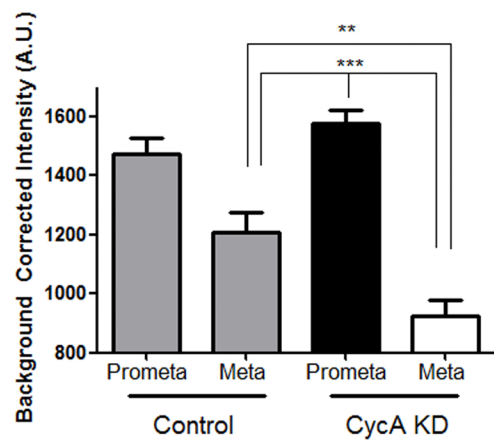

Figure 3 Figure Supplement III

Supplement: supp [file elife-29303-supp-v1.zip]

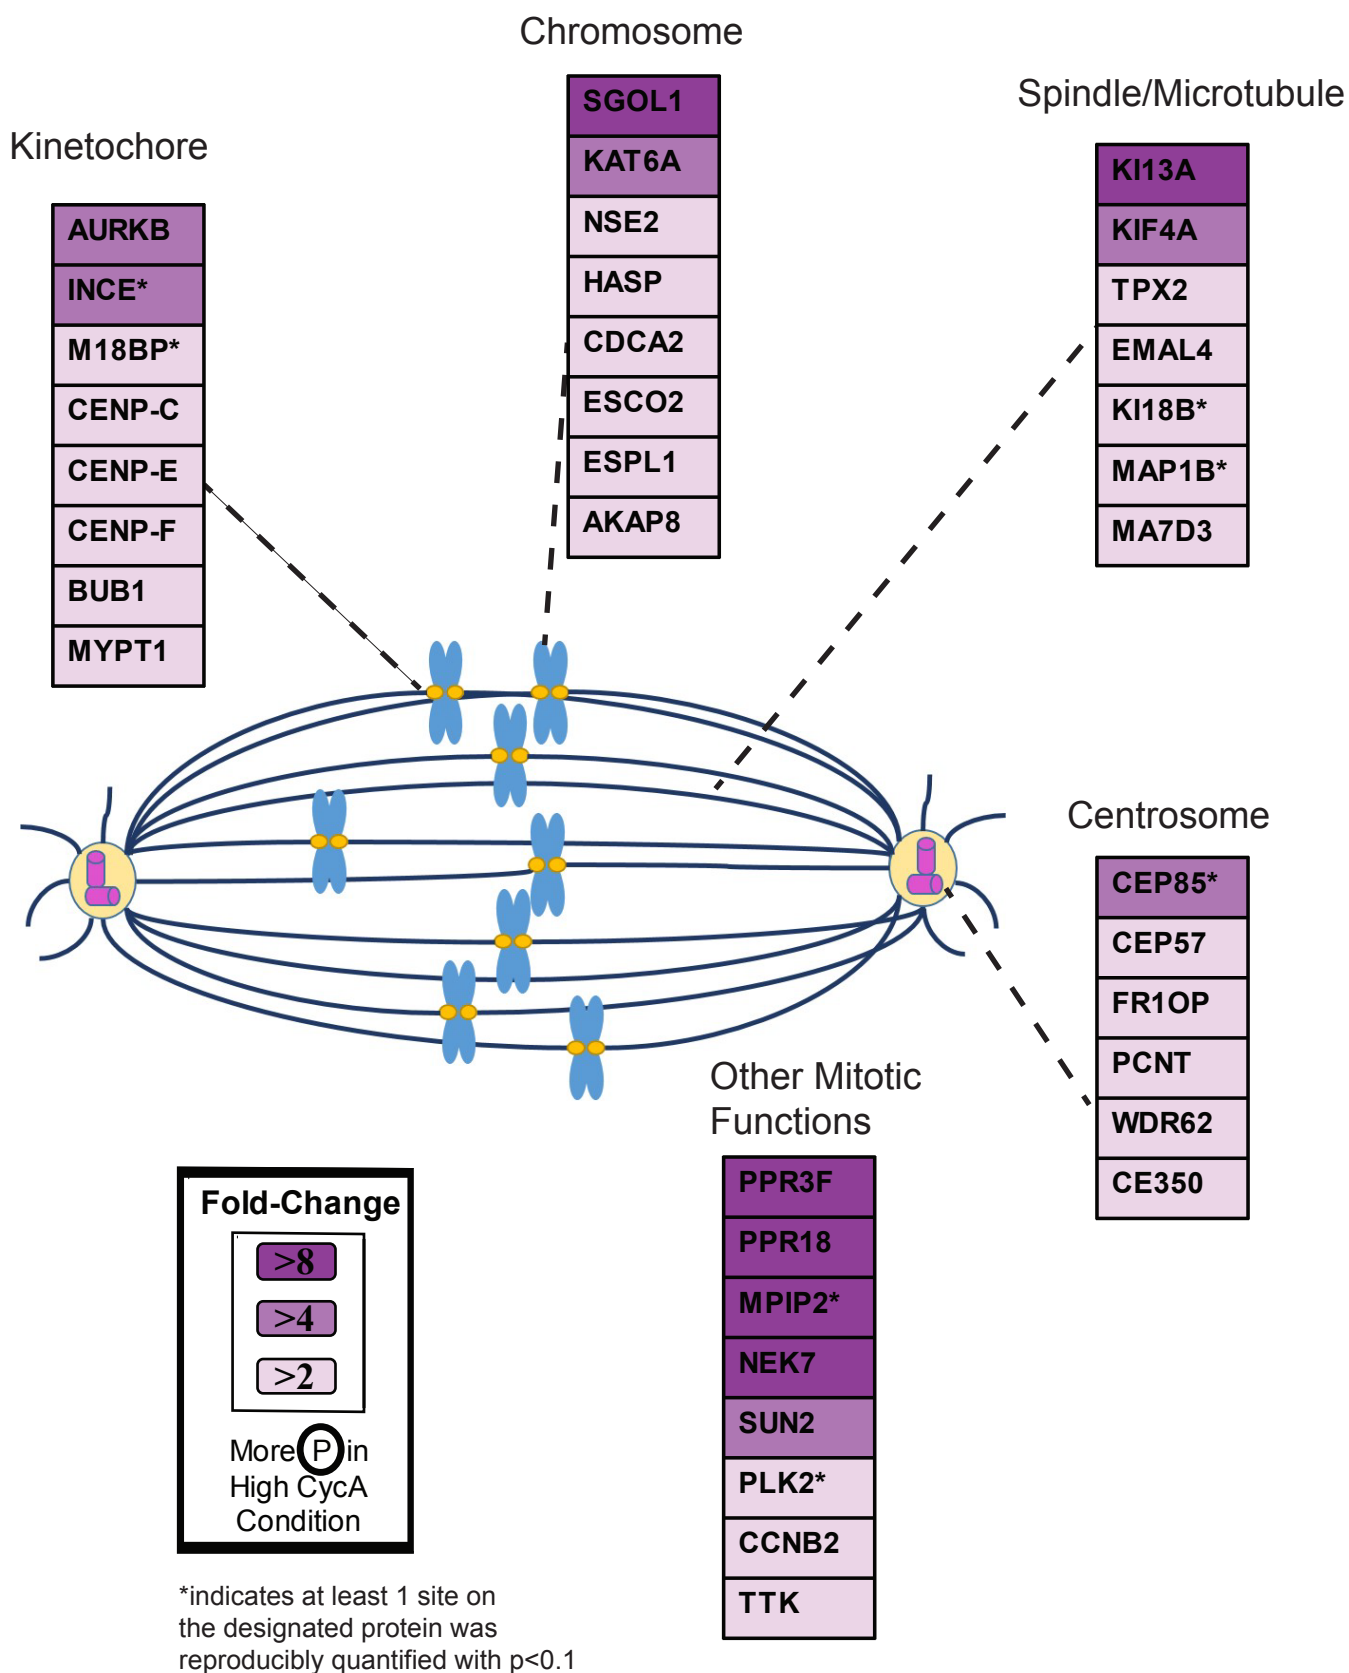

Figure 1 Figure Supplement II

Supplement: supp [file elife-29303-supp-v1.zip]

IV

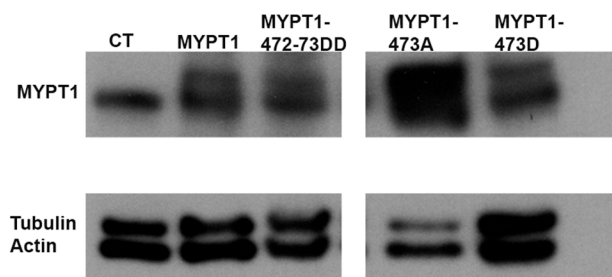

Figure 4 Figure Supplement IV

Supplement: supp [file elife-29303-supp-v1.zip]

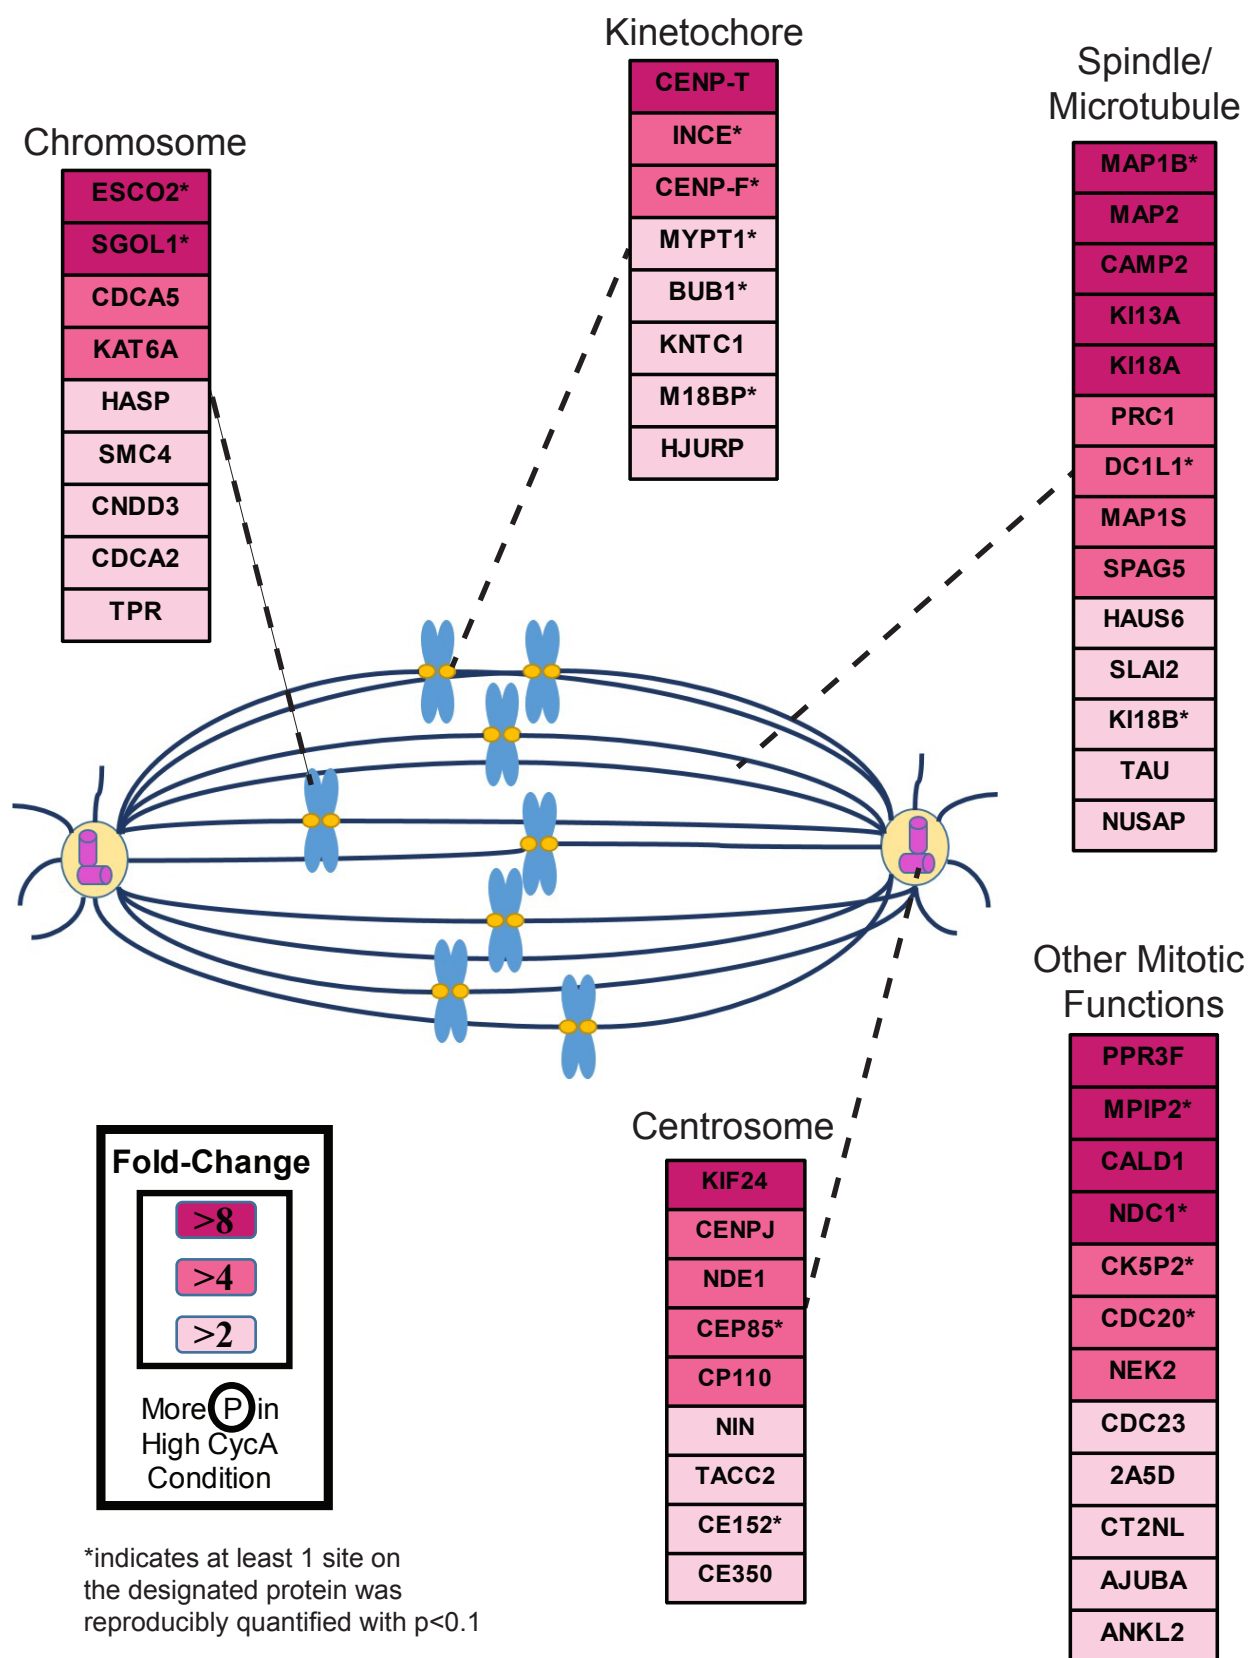

Figure 1 Figure Supplement I

Supplement: supp [file elife-29303-supp-v1.zip]

A

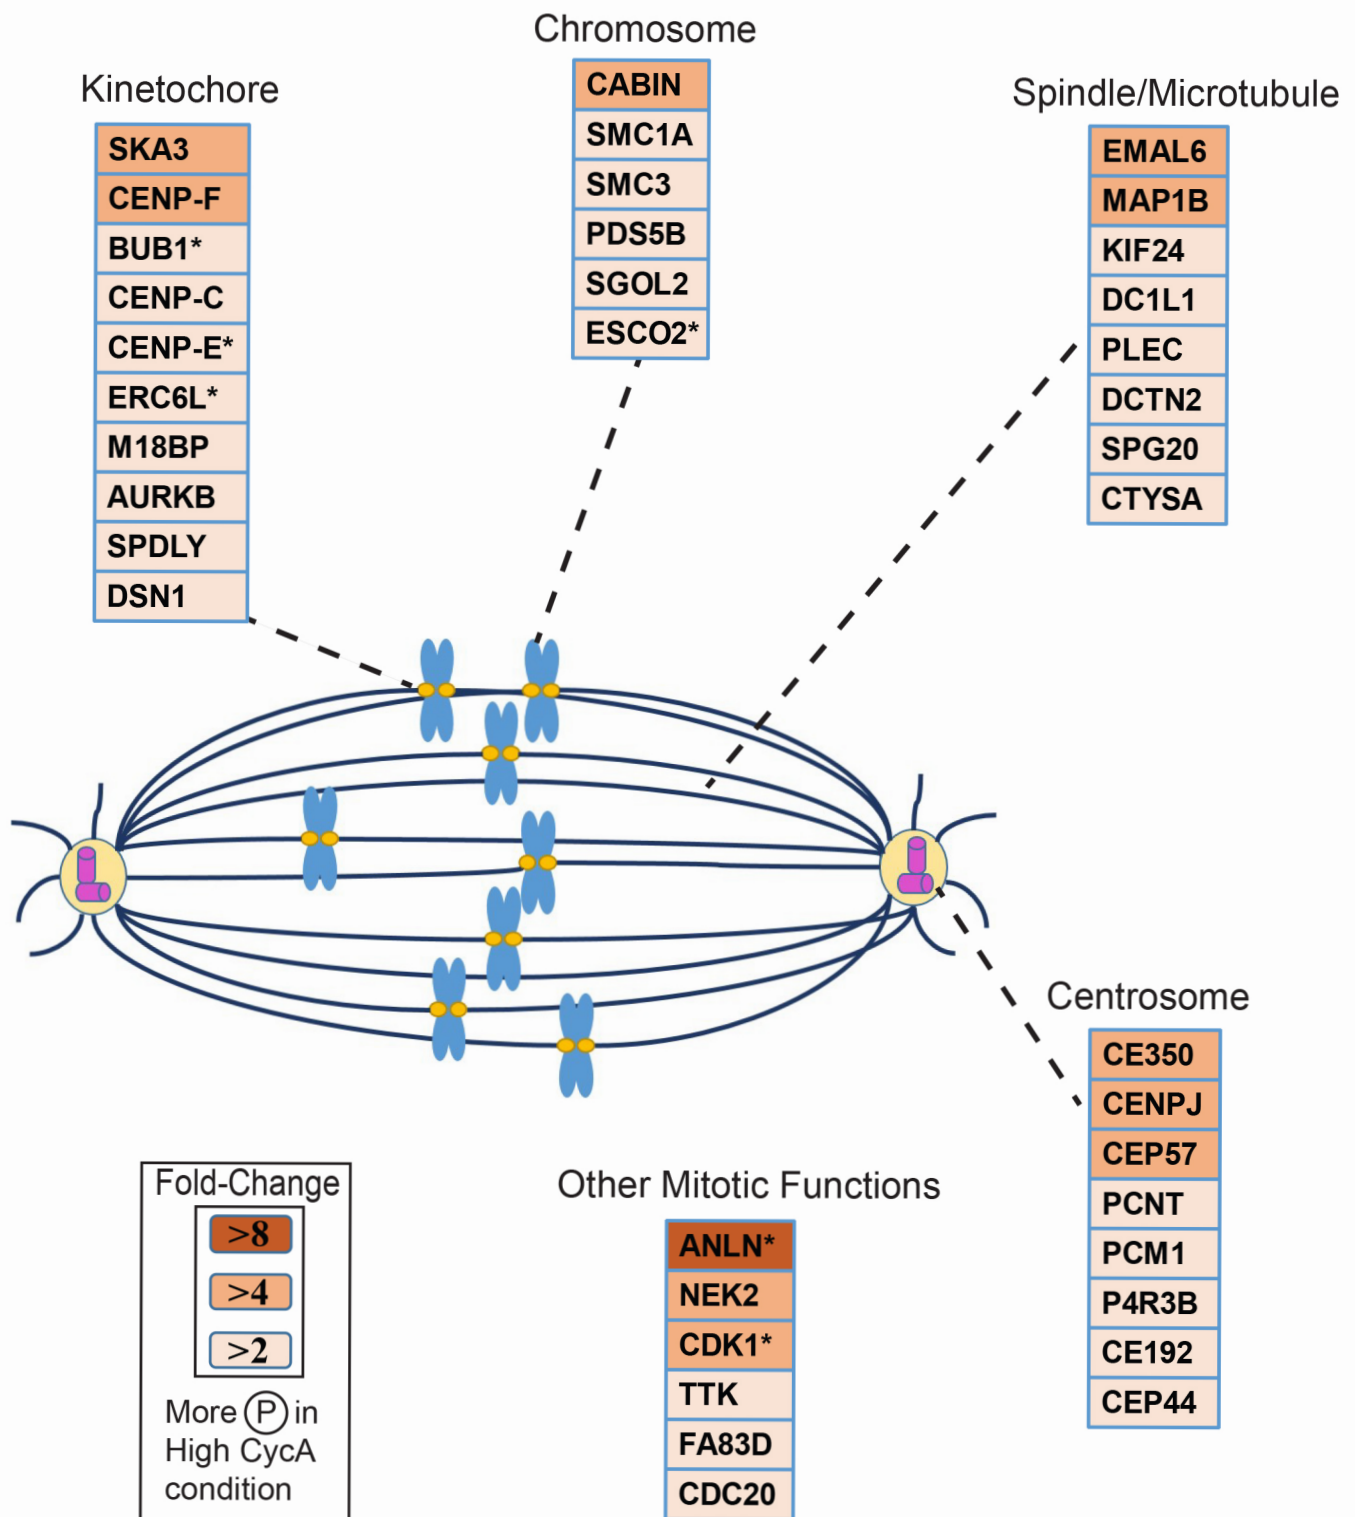

Figure 1 Figure Supplement III

Supplement: supp [file elife-29303-supp-v1.zip]

I

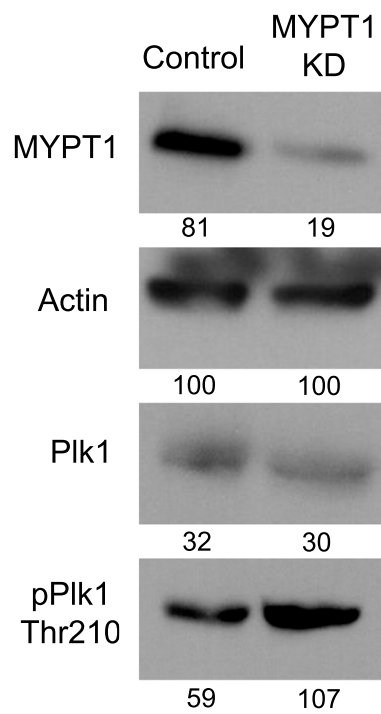

Figure 3 Figure Supplement I

Supplement: supp [file elife-29303-supp-v1.zip]

I

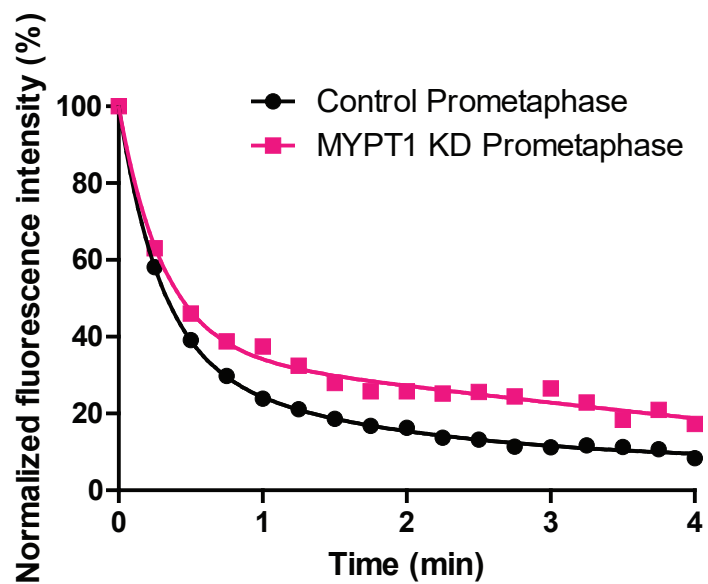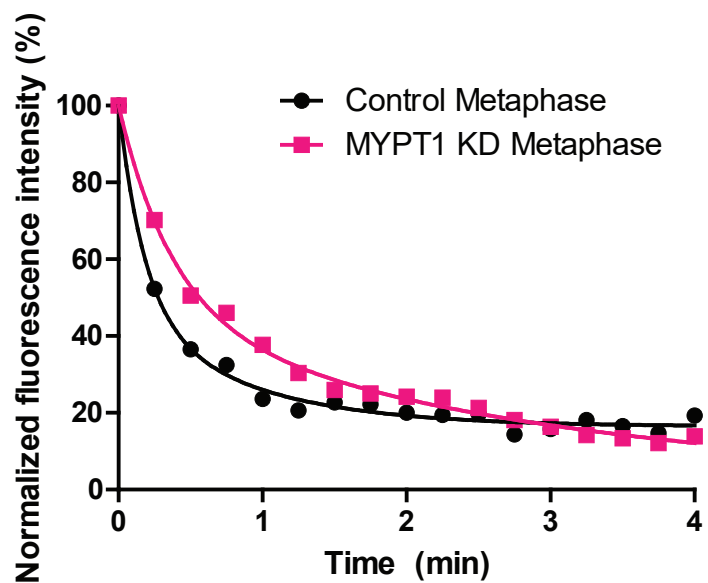

Figure 4 Figure Supplement I

Supplement: supp [file elife-29303-supp-v1.zip]
